# Supplementary material for: Novel chalcone-based crown ethers: synthesis, characterization, antioxidant activity, biological evaluations, and wastewater remediation
Source: Royal Society of Chemistry journal article supplement (doi:10.1039/d3ra08133h), 2024-01-01
Supplement: d3ra08133h1.pdf [file d3ra08133h1.pdf]

# Novel Crown Ether Chalcone-Based: Synthesis, Characterization, Antioxidant, Biological evaluations and Wastewater Treatment

Muhamad Salam Ahmad<sup>1</sup>, \*, Farouq Emam Hawaiz<sup>1</sup>

<sup>1</sup>Department of Chemistry, College of Education, Salahaddin University-Erbil, Kurdistan, Iraq

\*Corresponding Author's E-mail: [muhamedsalam15@gmail.com](mailto:muhamedsalam15@gmail.com)

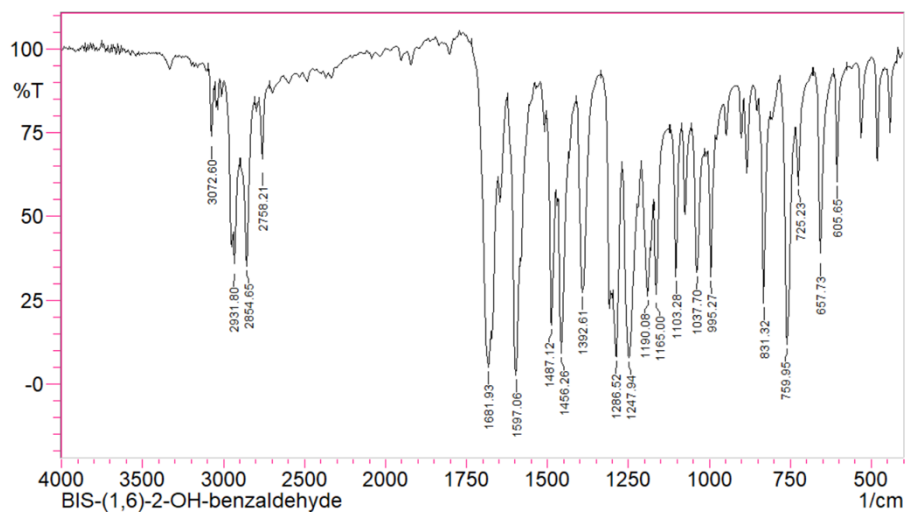

Fig.1. FT-IR spectrum of compound (1a)

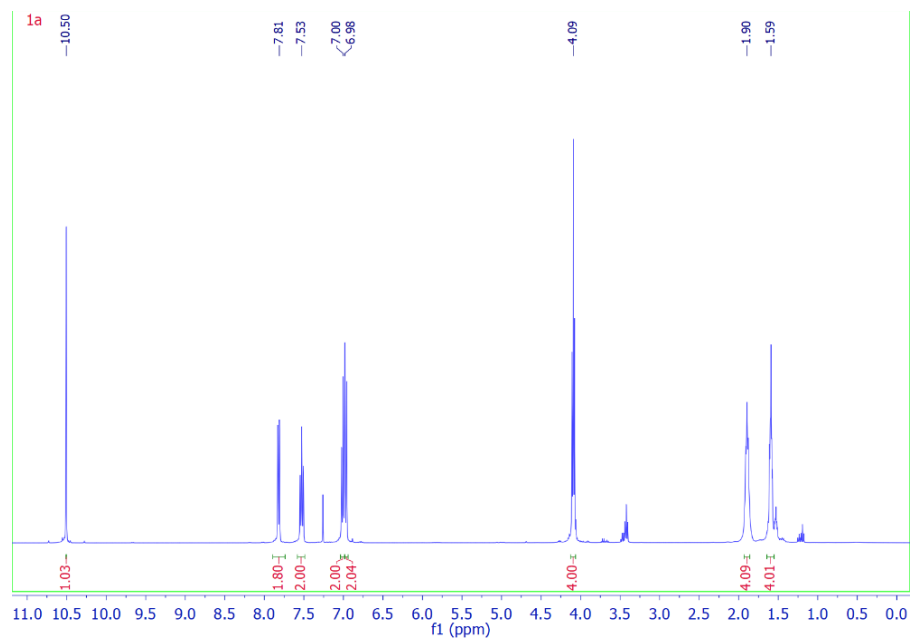

Fig.2. <sup>1</sup>H NMR spectrum of compound (1a)

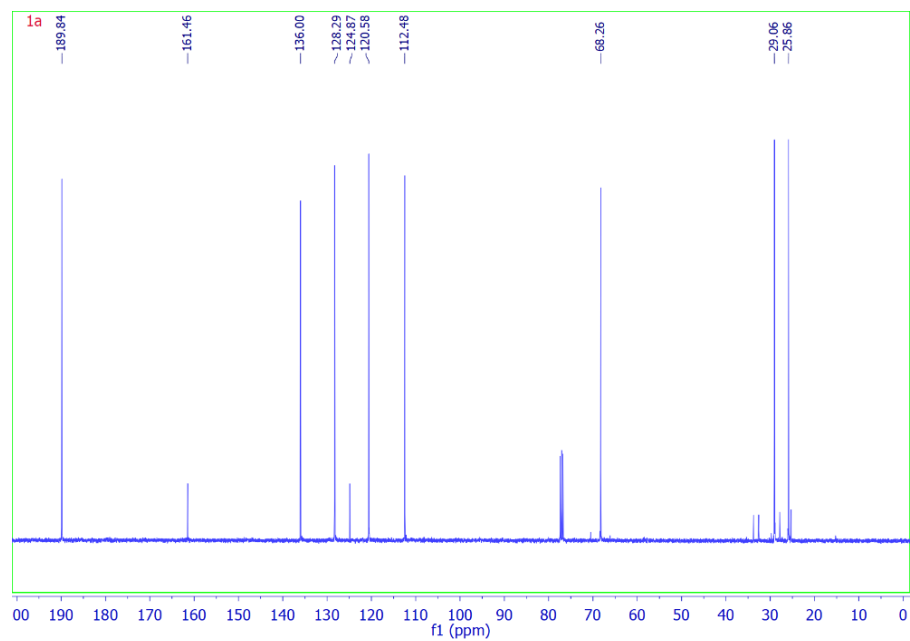

Fig.3. <sup>13</sup>C NMR spectrum of compound (1a)

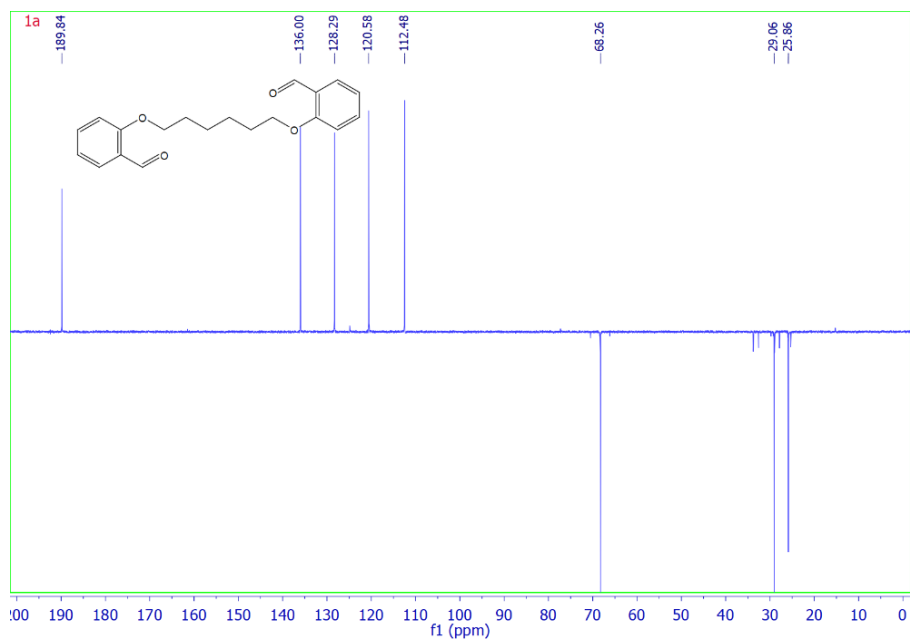

Fig.4. <sup>13</sup>C DEPT spectrum of compound (1a)

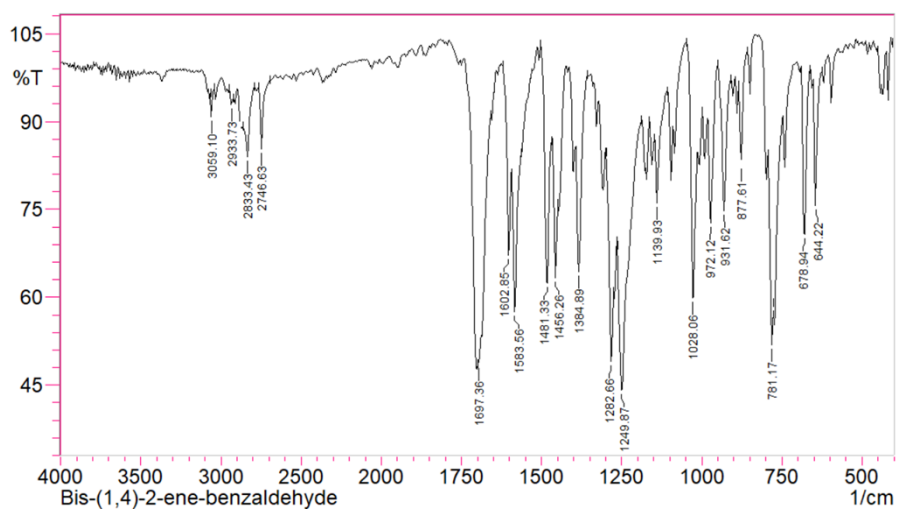

Fig.5. FT-IR spectrum of compound (1b)

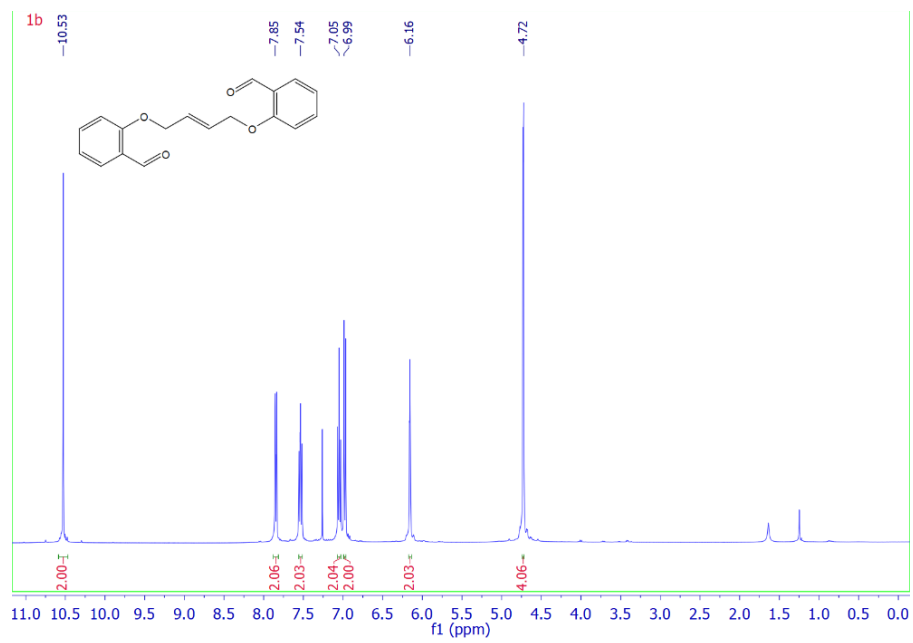

Fig.6. <sup>1</sup>H NMR spectrum of compound (1b)

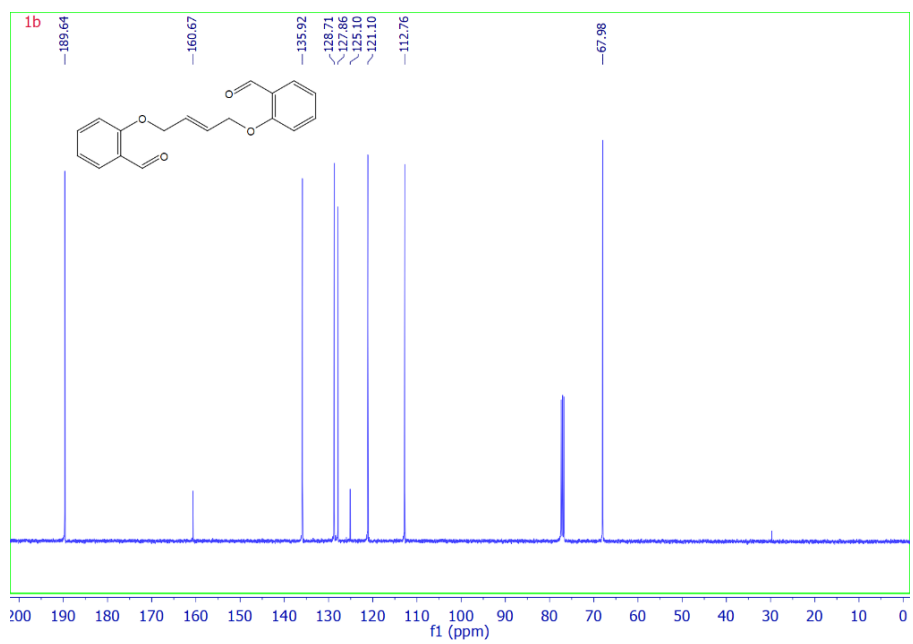

Fig.7. <sup>13</sup>C NMR spectrum of compound (1b)

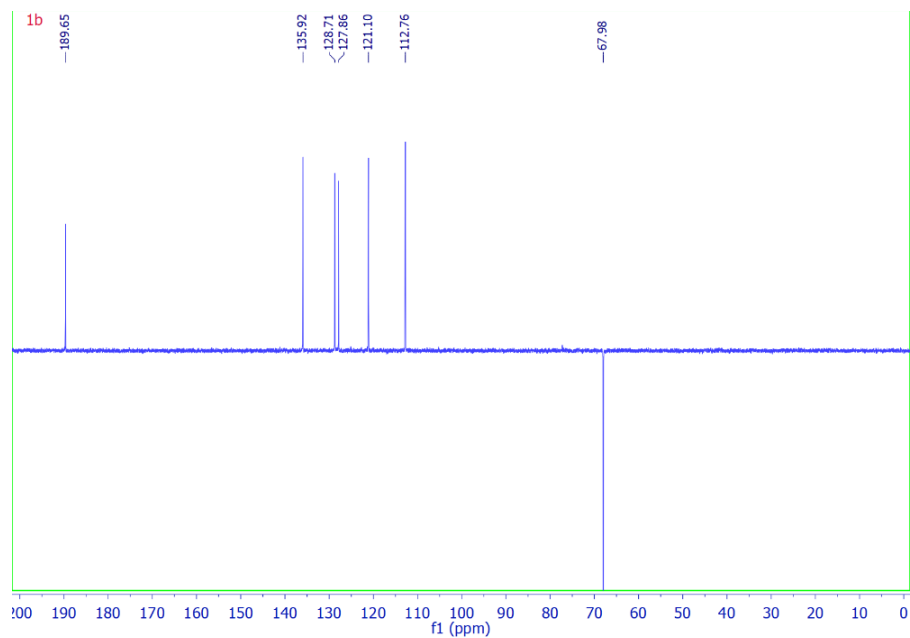

Fig.8.  $^{13}\text{C}$  DEPT spectrum of compound **(1b)**

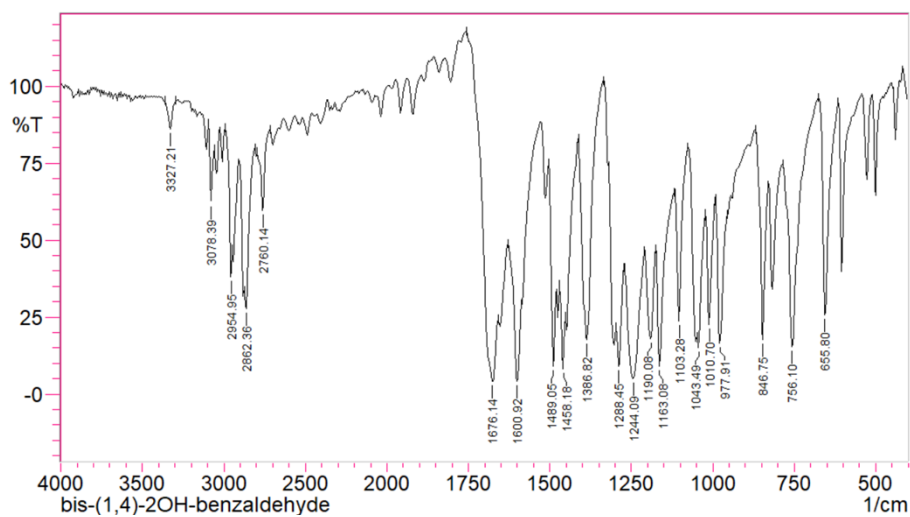

Fig.9. FT-IR spectrum of compound **(1c)**

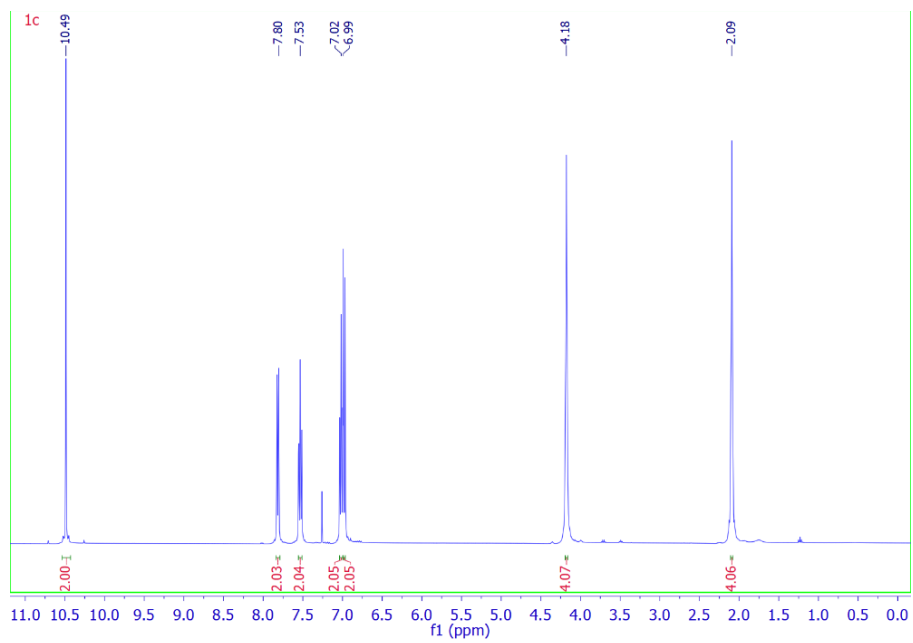

Fig.10. <sup>1</sup>H NMR spectrum of compound (1c)

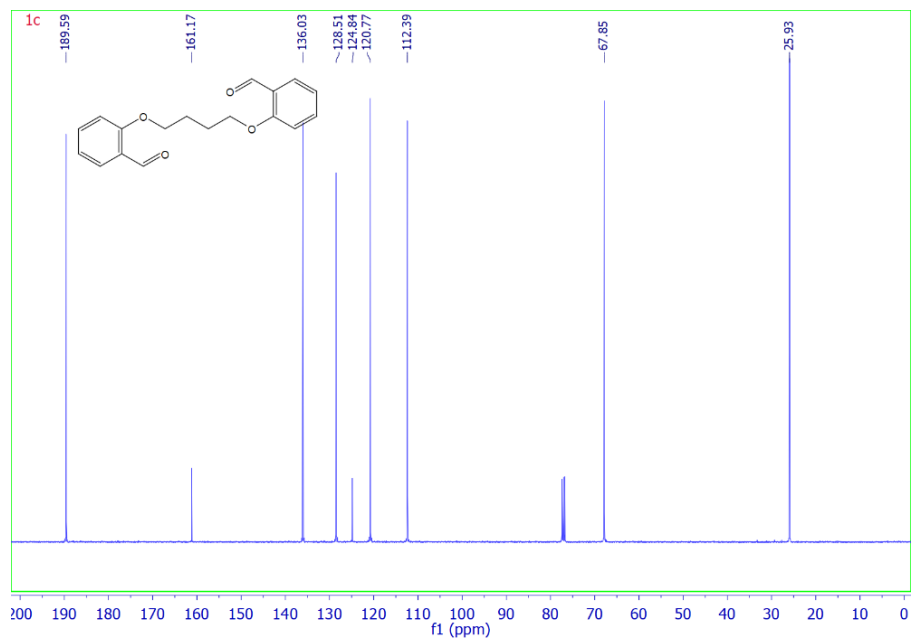

Fig.11. <sup>13</sup>C NMR spectrum of compound (1c)

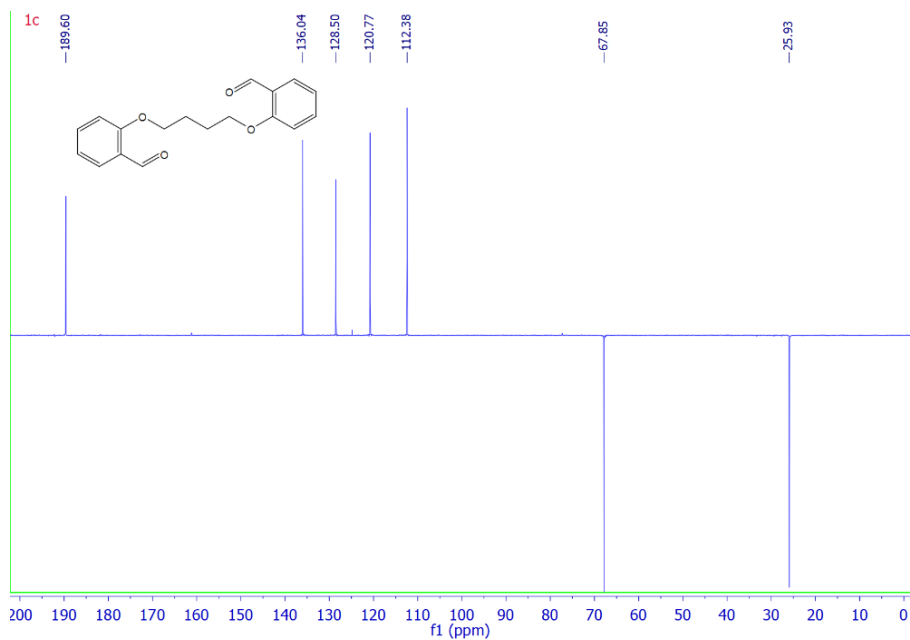

Fig.12.  $^{13}\text{C}$  DEPT spectrum of compound (**1c**)

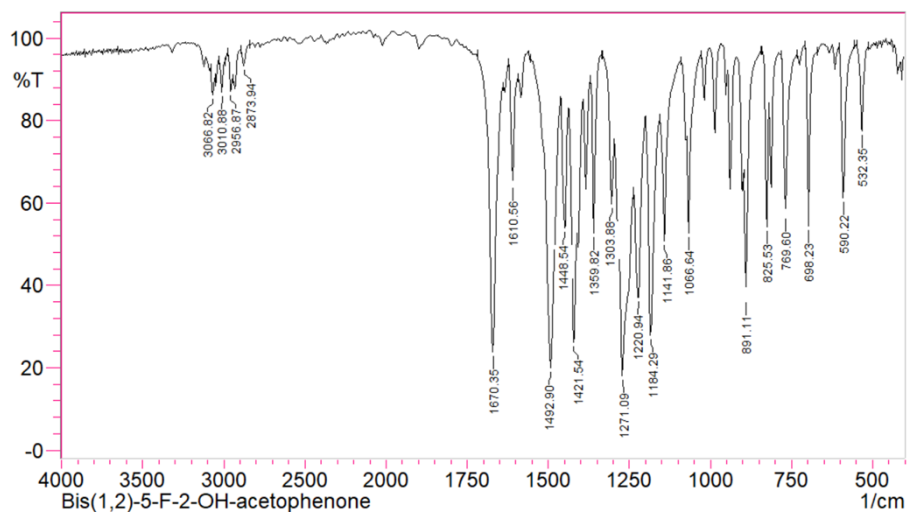

Fig.13. FT-IR spectrum of compound (**1d**)

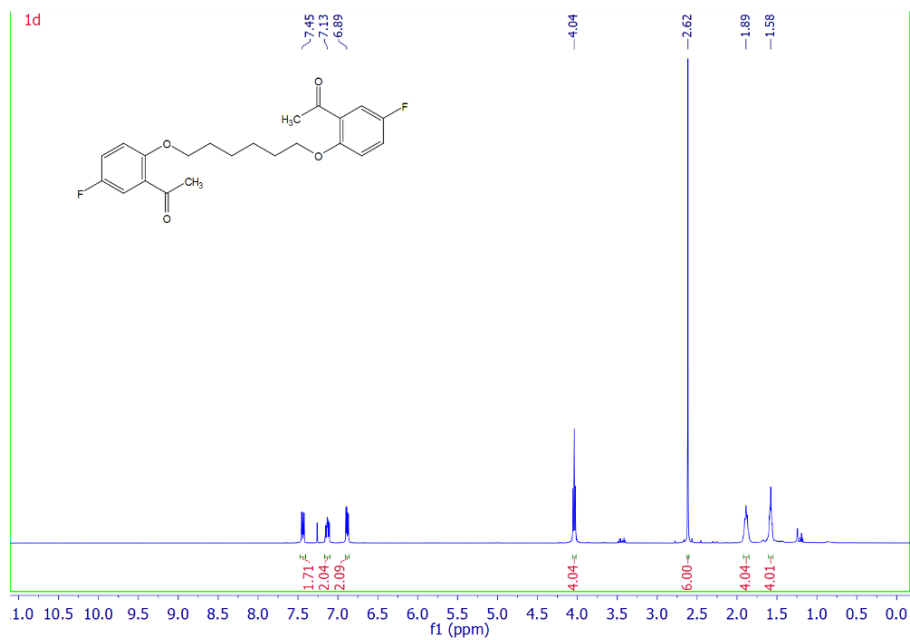

Fig.14. <sup>1</sup>H NMR spectrum of compound (**1d**)

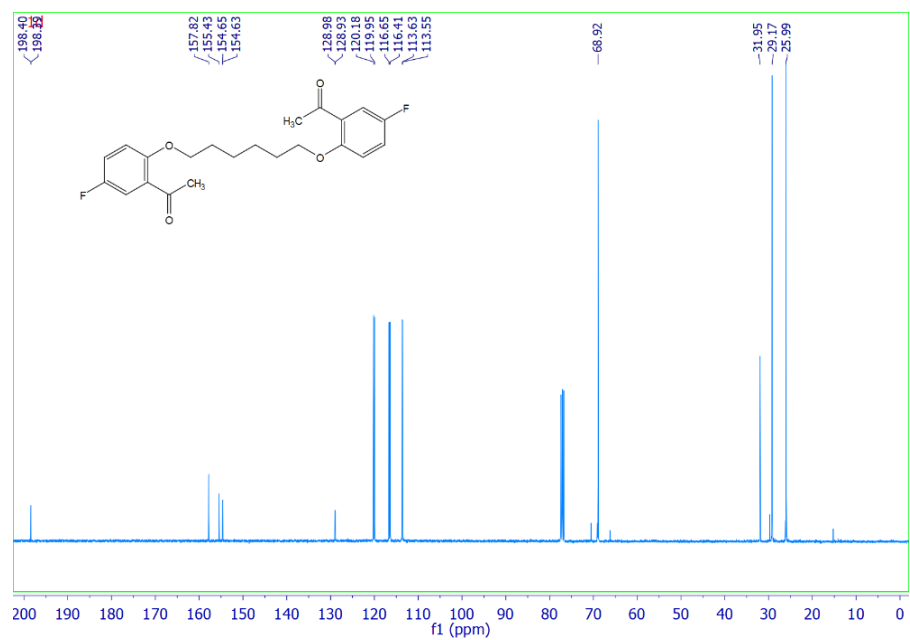

Fig.15. <sup>13</sup>C NMR spectrum of compound (**1d**)



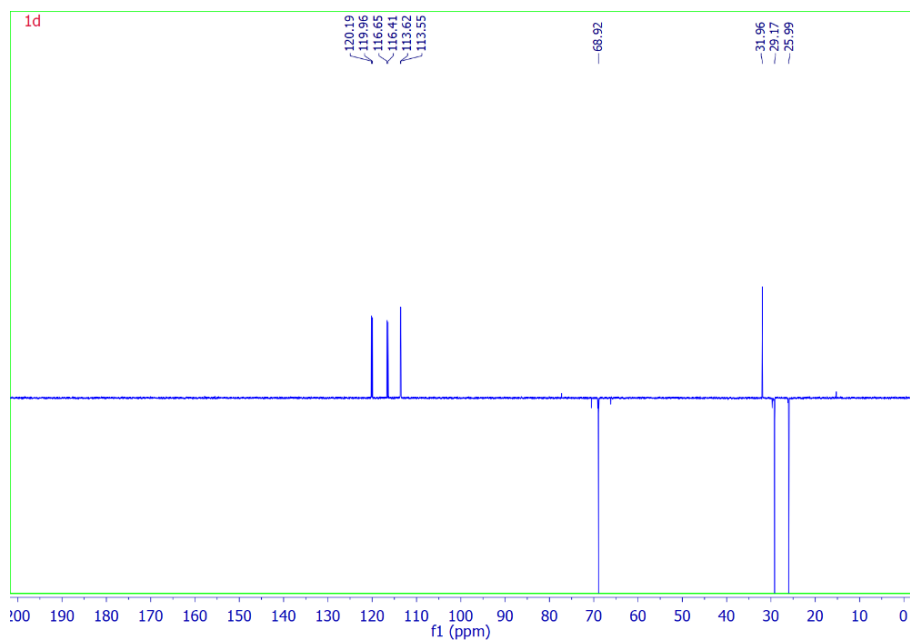

Fig.16.  $^{13}\text{C}$  DEPT spectrum of compound (**1d**)

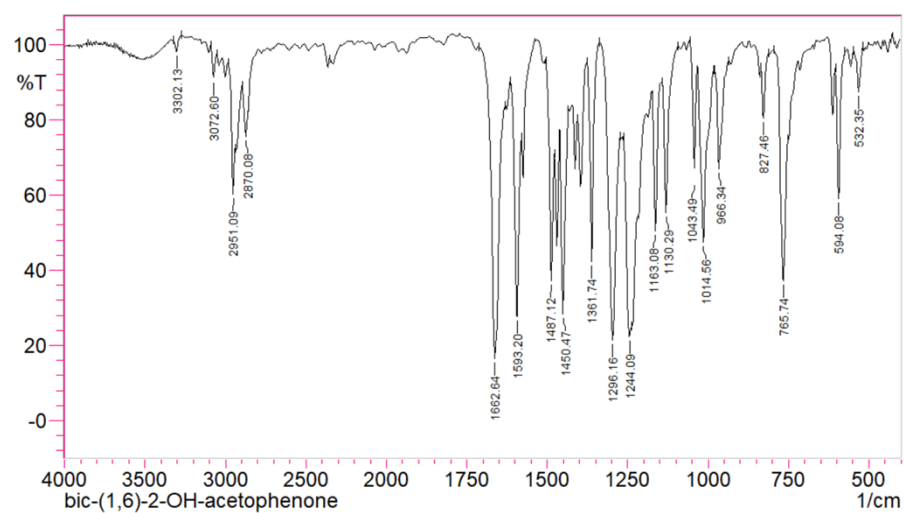

Fig.17. FT-IR spectrum of compound (**1e**)

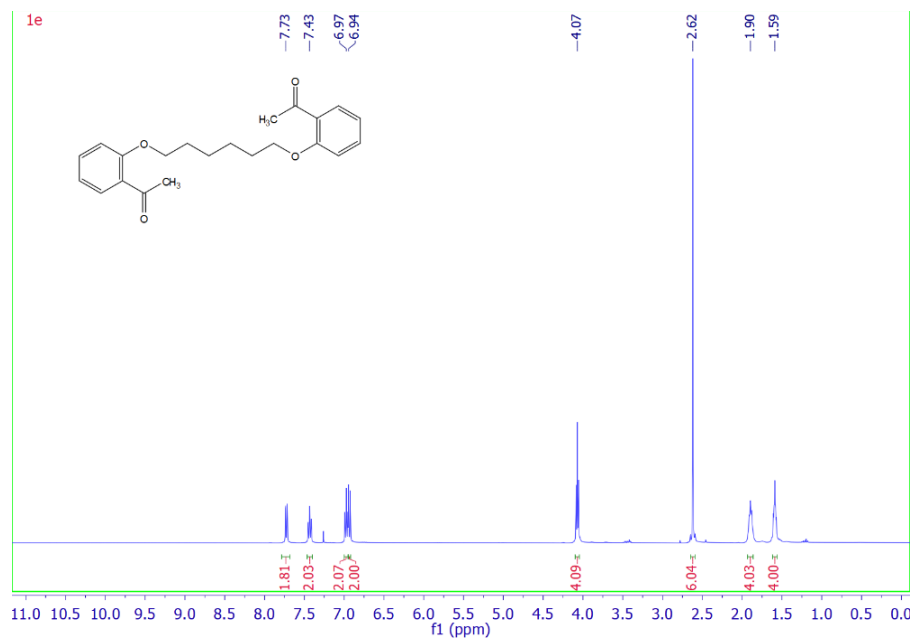

Fig.18. <sup>1</sup>H NMR spectrum of compound **(1e)**

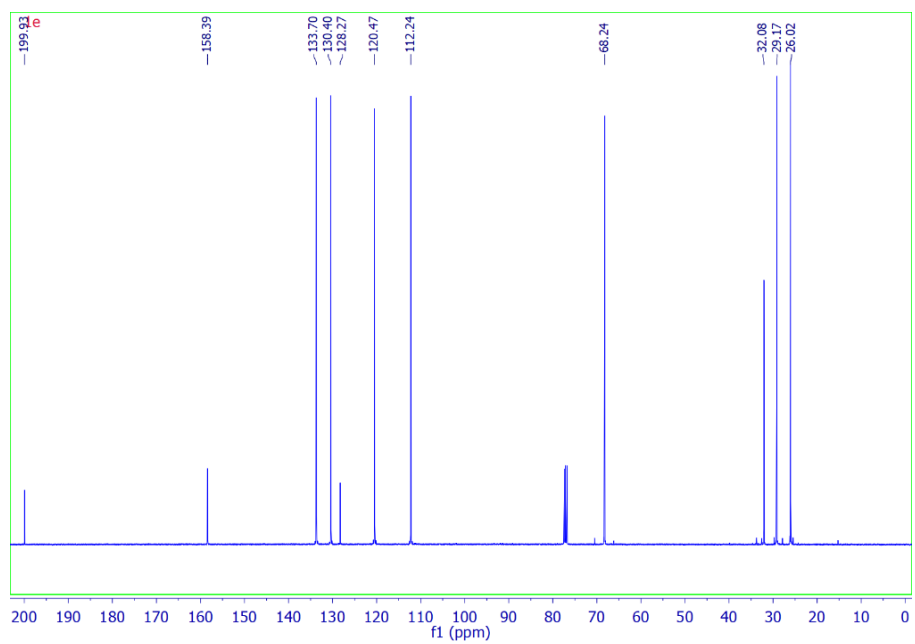

Fig.19. <sup>13</sup>C NMR spectrum of compound **(1e)**

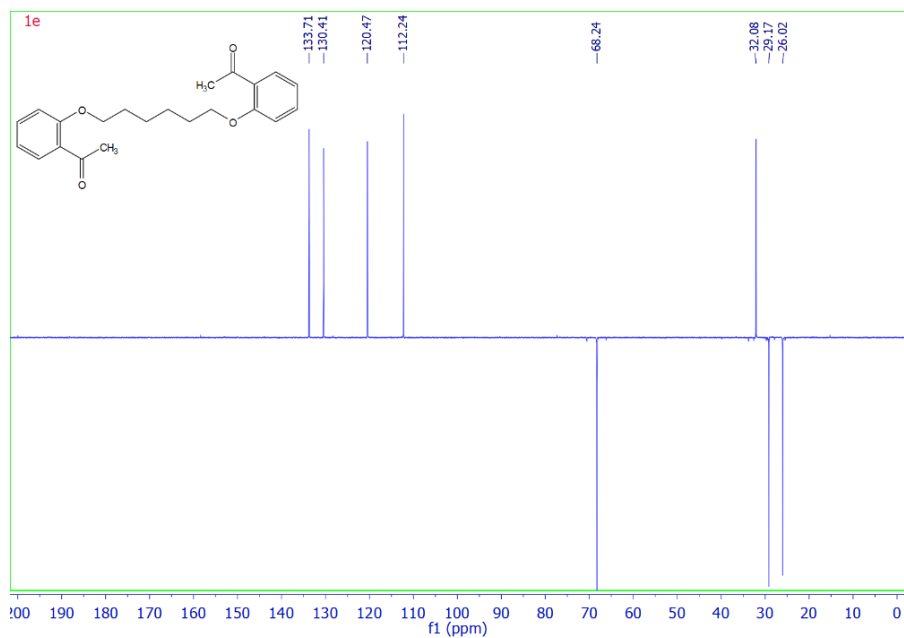

Fig.20.  $^{13}\text{C}$  DEPT spectrum of compound (1e)

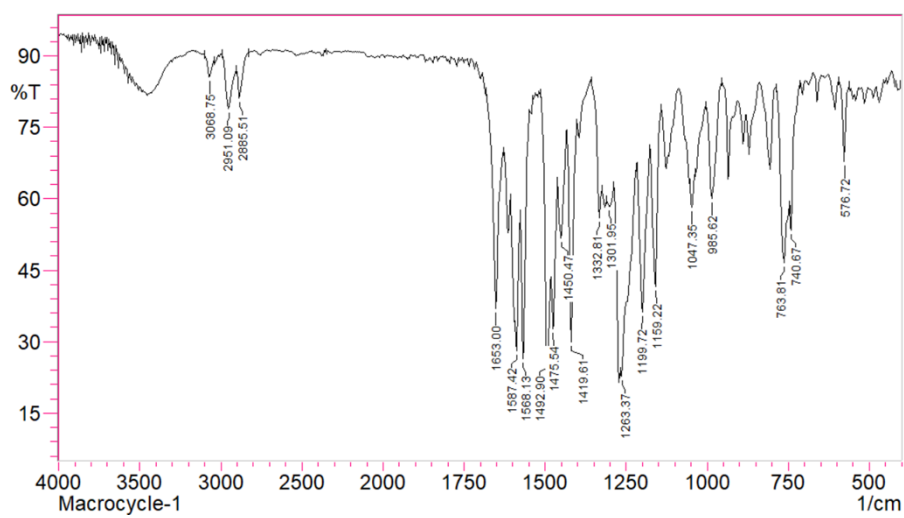

Fig.21. FT-IR spectrum of compound (2a)

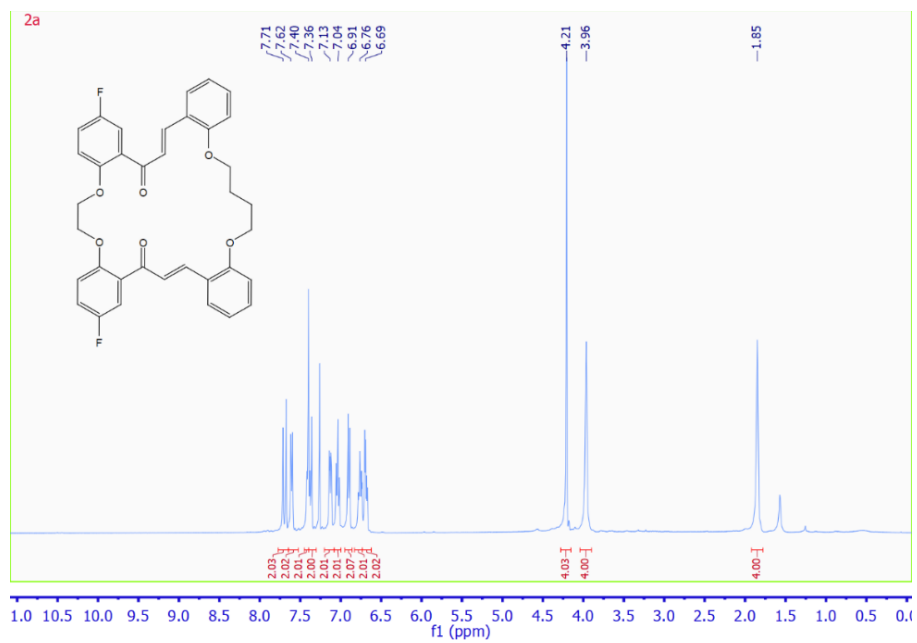

Fig.22.  $^1\text{H}$  NMR spectrum of compound (**2a**)

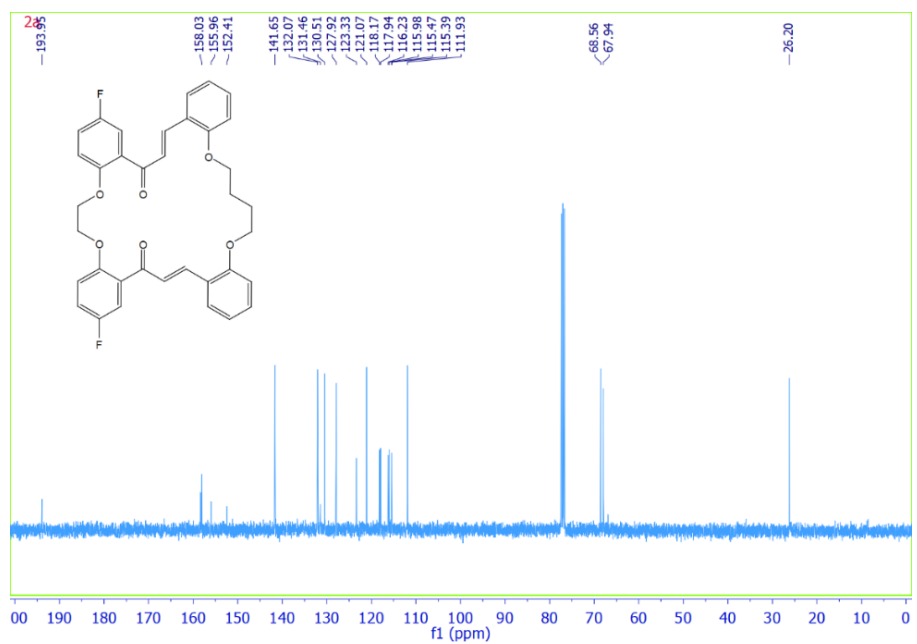

Fig.23.  $^{13}\text{C}$  NMR spectrum of compound (**2a**)

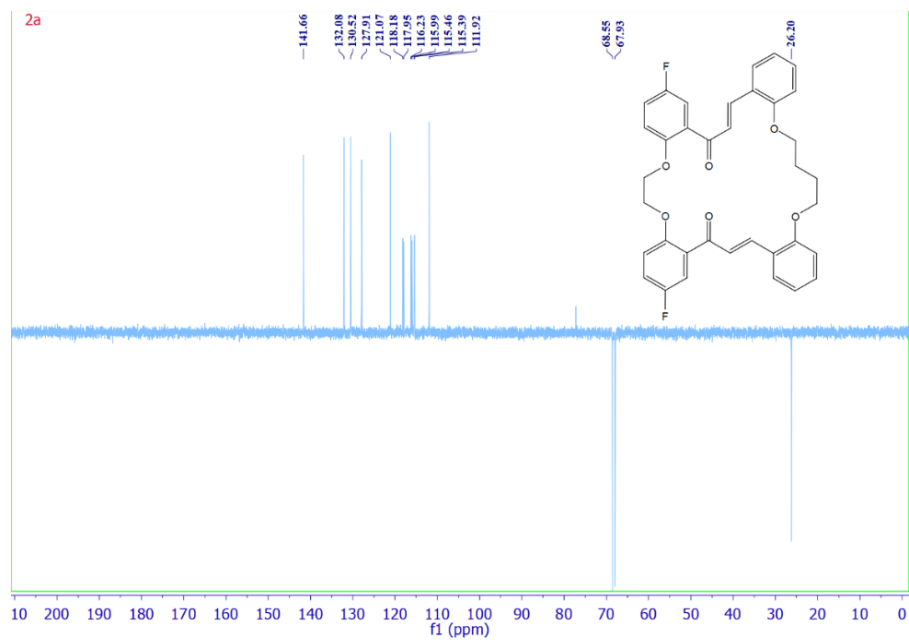

Fig.24. <sup>13</sup>C DEPT spectrum of compound (**2a**)

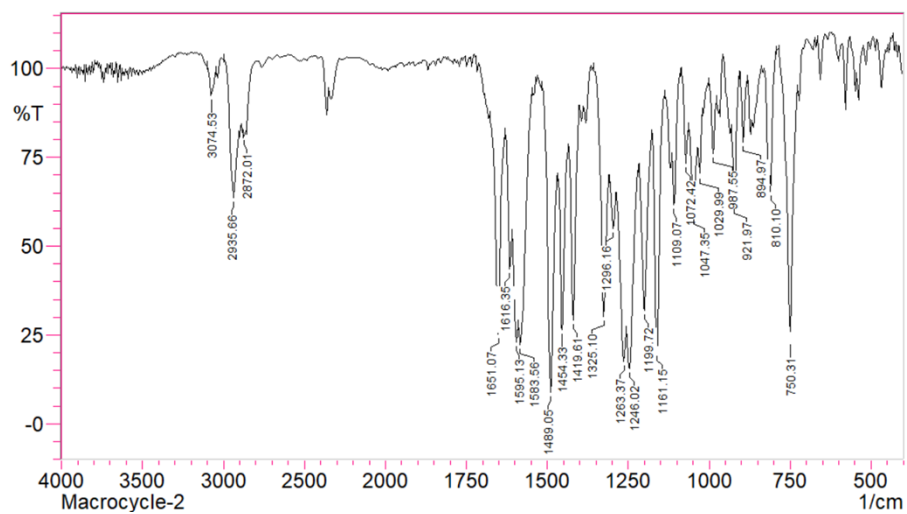

Fig.25. FT-IR spectrum of compound (**2b**)

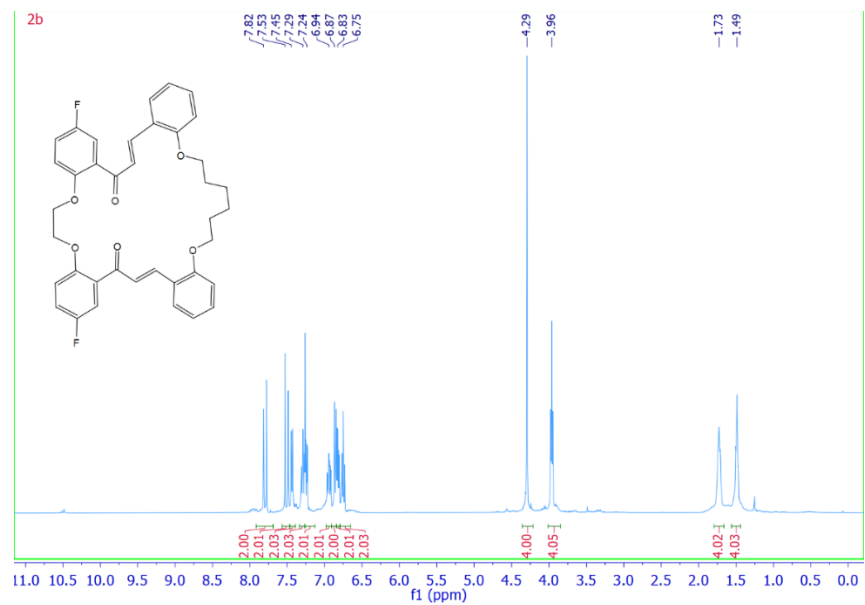

Fig.26. <sup>1</sup>H NMR spectrum of compound (**2b**)

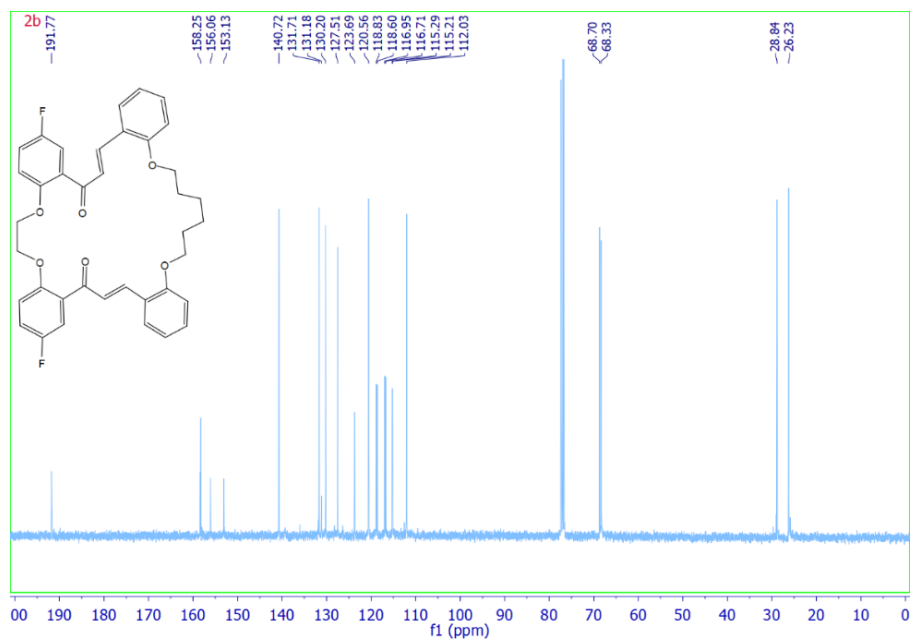

Fig.27. <sup>13</sup>C NMR spectrum of compound (**2b**)

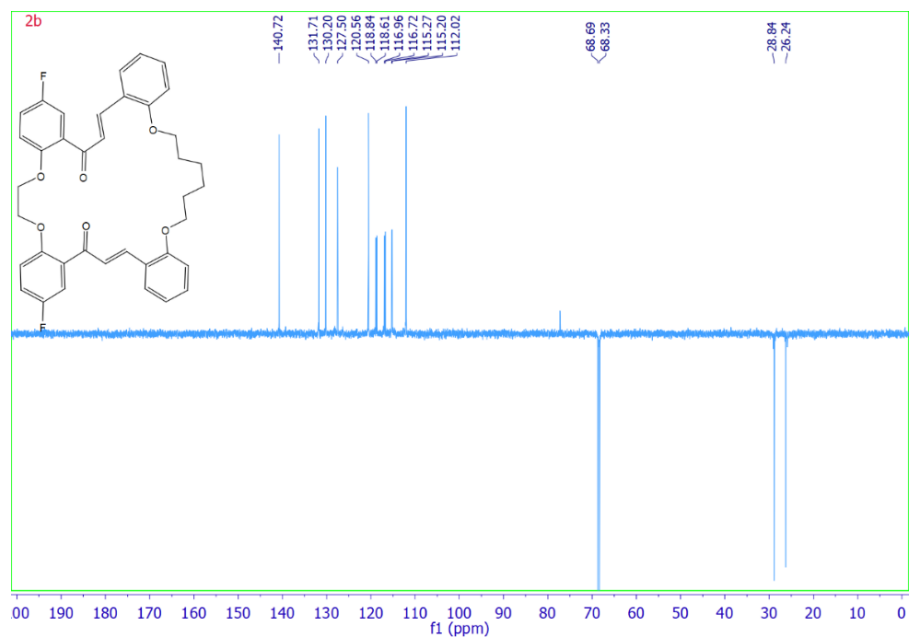

Fig.28.  $^{13}\text{C}$  DEPT spectrum of compound (**2b**)

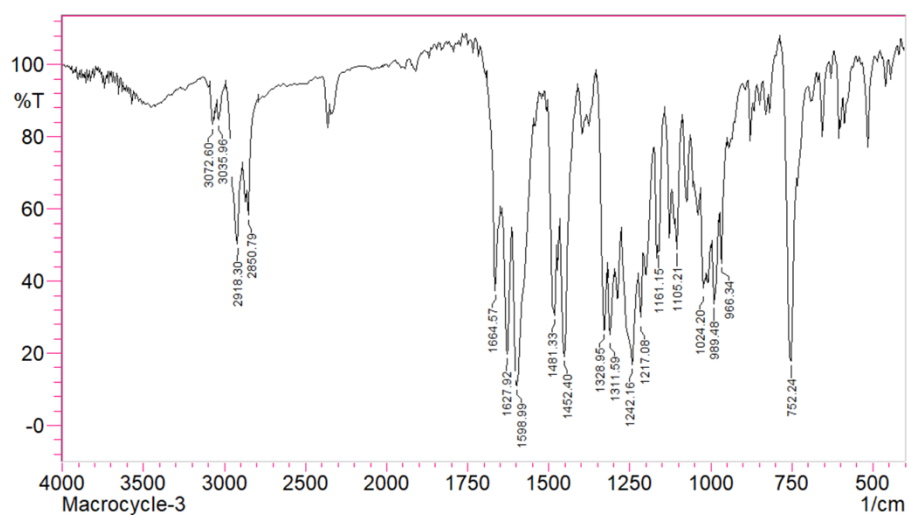

Fig.29. FT-IR spectrum of compound (**2c**)

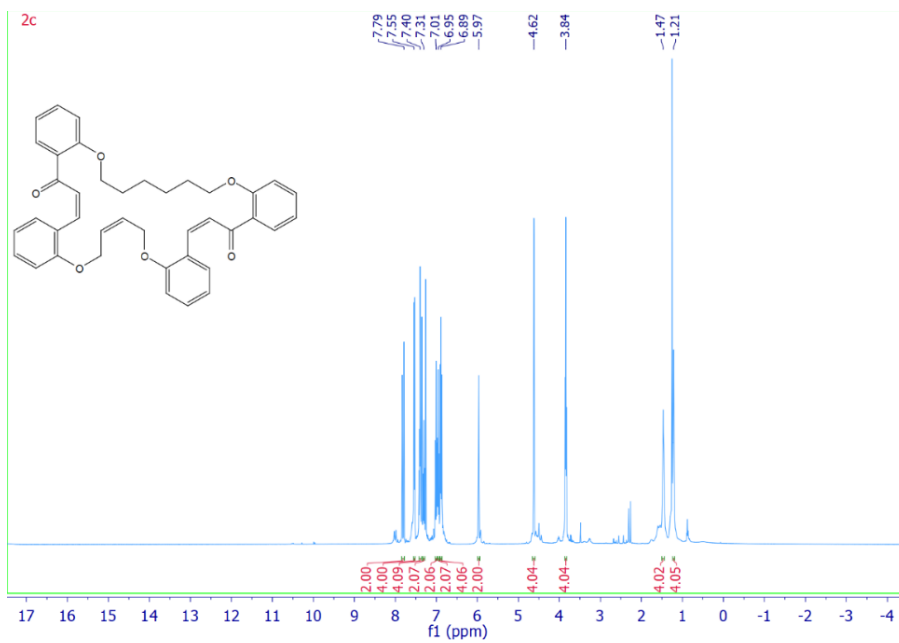

Fig.30. <sup>1</sup>H NMR spectrum of compound (**2c**)

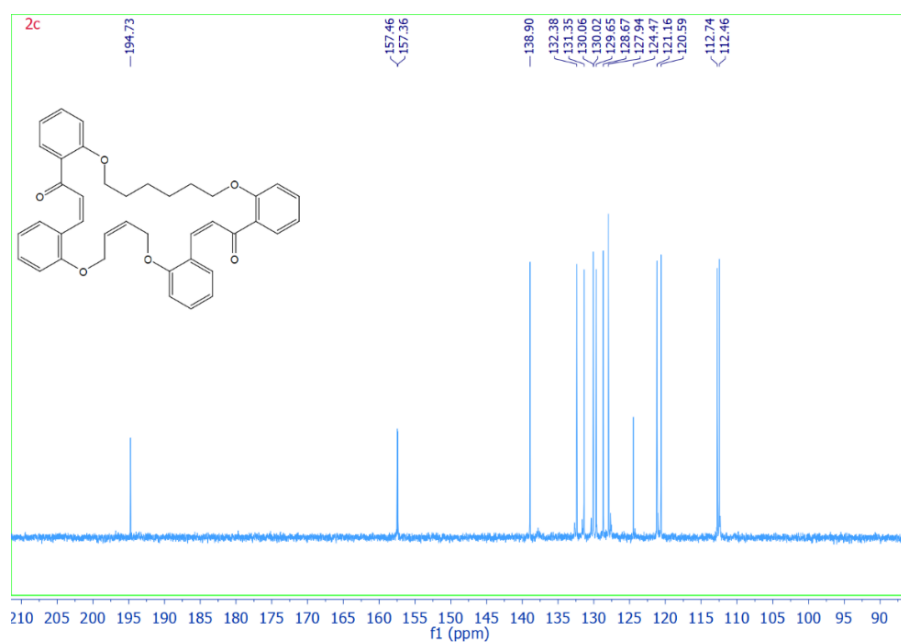

Fig.31. <sup>13</sup>C NMR spectrum of compound (**2c**)



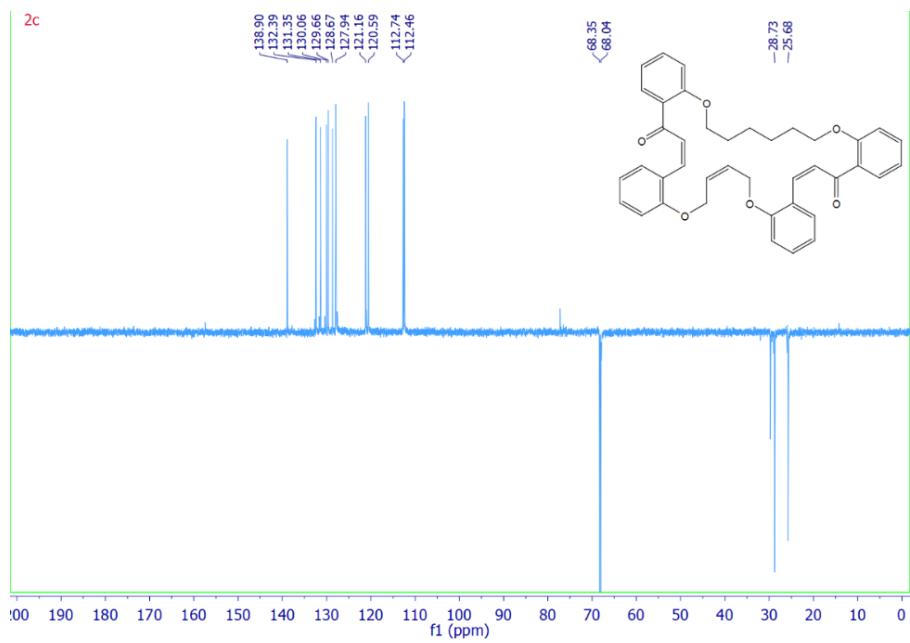

Fig.32.  $^{13}\text{C}$  DEPT spectrum of compound (**2c**)

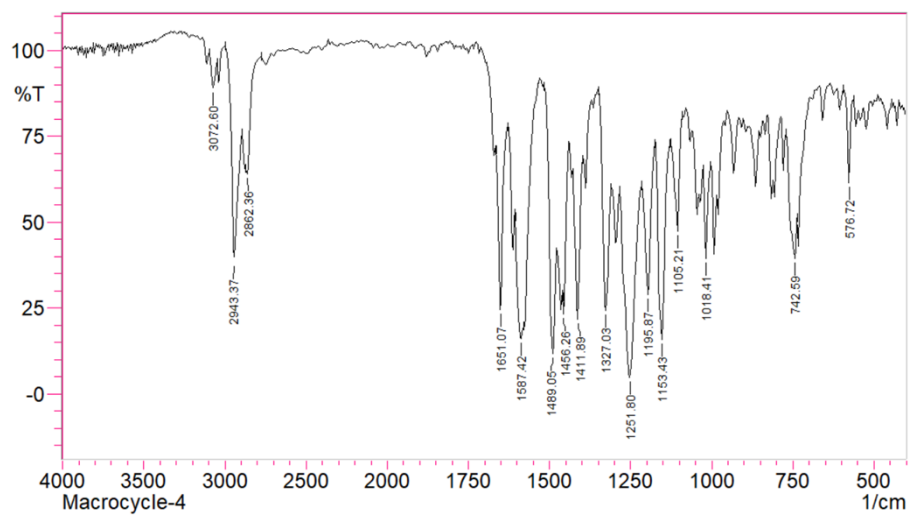

Fig.33. FT-IR spectrum of compound (**2d**)

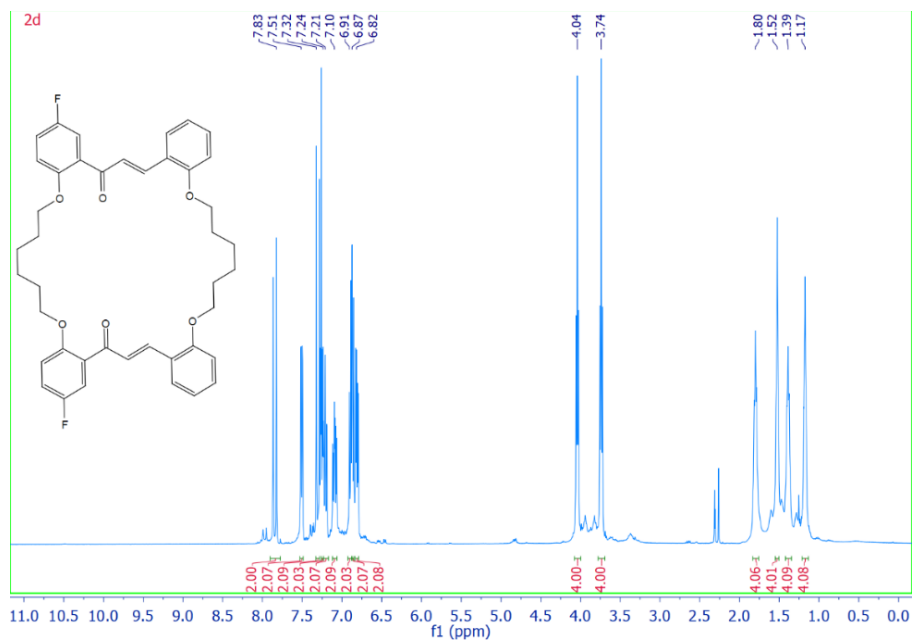

Fig.34. <sup>1</sup>H NMR spectrum of compound (**2d**)

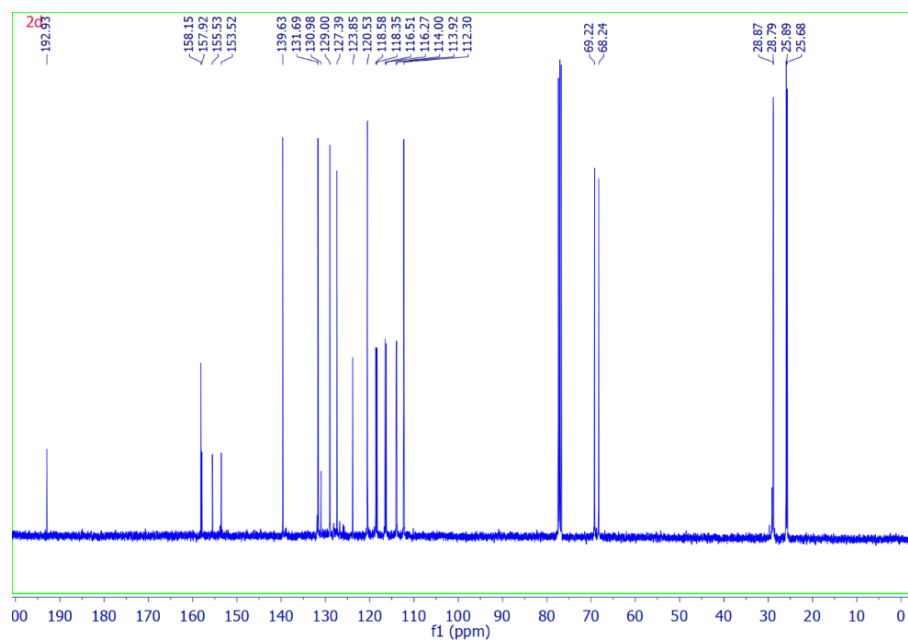

Fig.35. <sup>13</sup>C NMR spectrum of compound (**2d**)

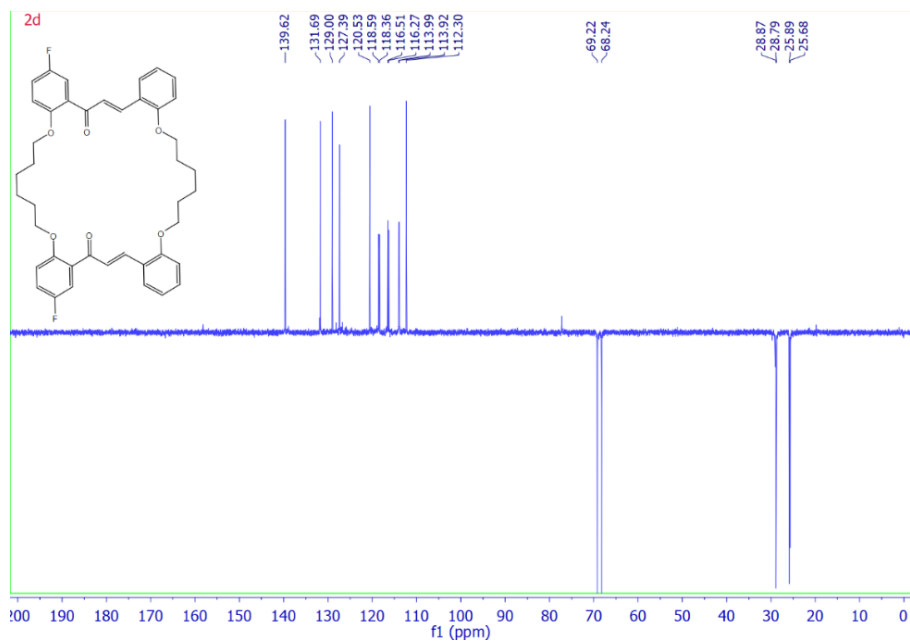

Fig.36.  $^{13}\text{C}$  DEPT spectrum of compound (**2d**)

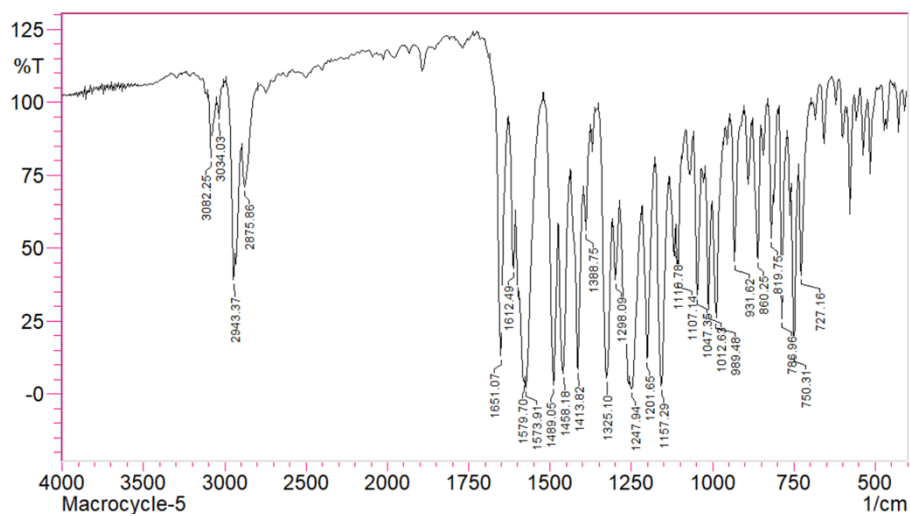

Fig.37. FT-IR spectrum of compound (**2e**)

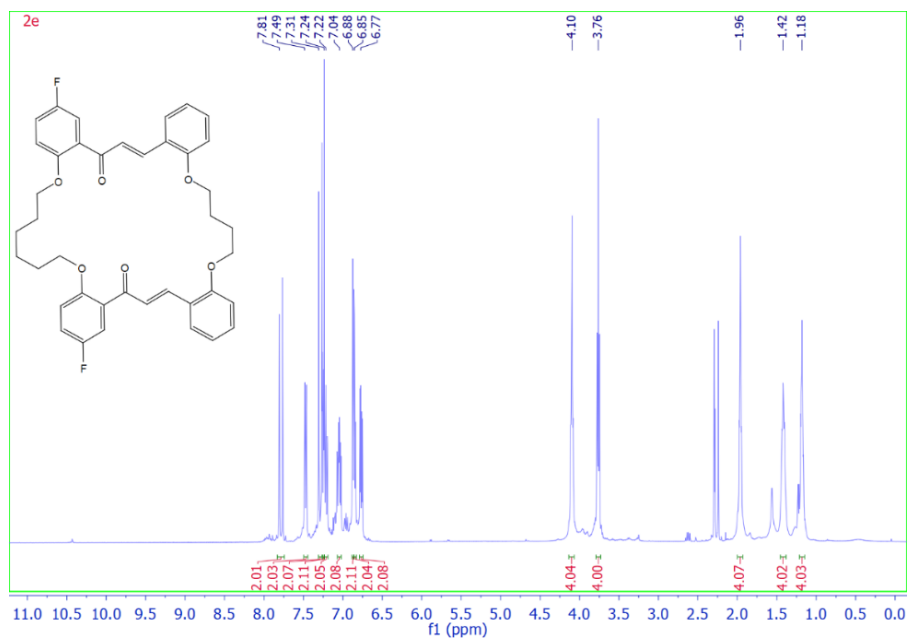

Fig.38. <sup>1</sup>H NMR spectrum of compound (**2e**)

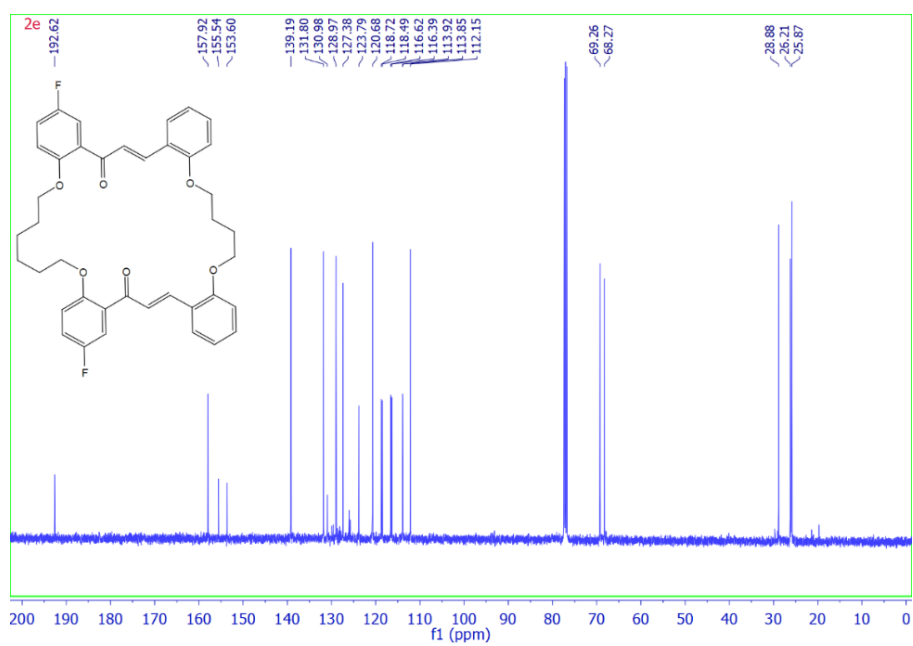

Fig.39. <sup>13</sup>C NMR spectrum of compound (**2e**)

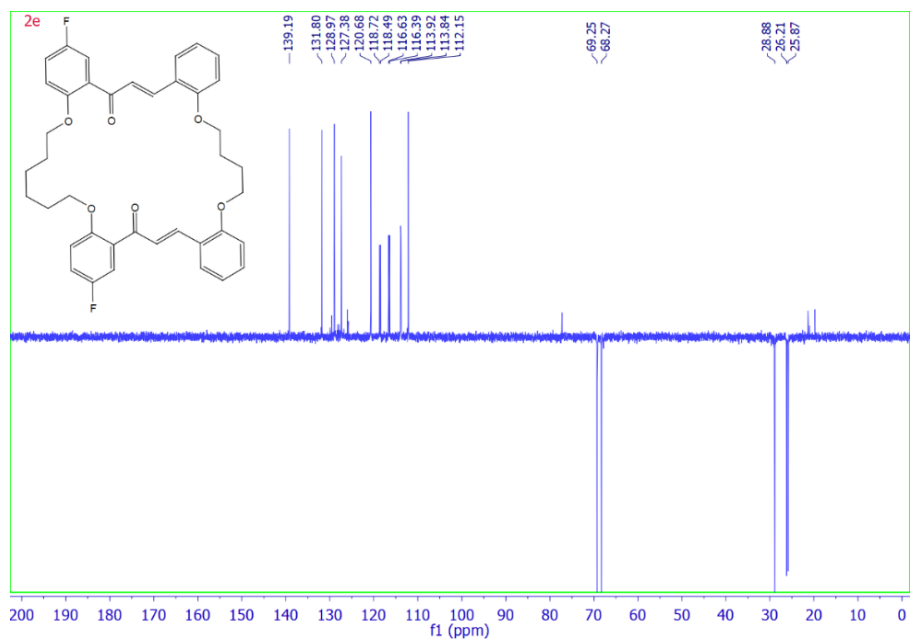

Fig.40.  $^{13}\text{C}$  DEPT spectrum of compound (**2e**)
